# Supplementary material for: The molecular mechanisms underlying neutrophil infiltration in vessel co-opting colorectal cancer liver metastases
Source: Front Oncol. 2022 Oct 18;12:1004793. doi: 10.3389/fonc.2022.1004793 (PMC9623070; doi:10.3389/fonc.2022.1004793)
Supplement: Supplementary Table 1 — The positivity of the IHC images. [file Table_1.xlsx]

## Sheet: Sheet1
Figure 1
LY6G (Strong positivity)	shRNA-Scrambled	shRNA-RUNX1
	1	0.226322
	1.4244	0.409833
	1.58593	0.332774
	1.79239	0.314503
	1.40613	0.343278
RUNX1 (Positivity)	shRNA-Scrambled	shRNA-RUNX1
	1	0.275395
	0.806801	0.231595
	1.12671	0.312294
	0.935937	0.330648
	0.883545	0.253489
Figure 3
Ang1 (Positivity)	shRNA-Scrambled	shRNA-RUNX1
	1	0.47
	1.31	0.2
	1.37	0.38
	0.89	0.26
	1.24	0.1
Figure 4
Ang1 (Positivity)	Ang1-WT	Ang1-KO
	1	0.33
	1.21	0.25
	1.02	0.37
	0.96	0.12
	1.46	0.29
LY6G (Strong positivity)	Ang1-WT	Ang1-KO
	1	0.2
	0.91	0.11
	1	0.14
	0.68	0.13
	1.07	0.31
