# Supplementary material for: The molecular mechanisms underlying neutrophil infiltration in vessel co-opting colorectal cancer liver metastases
Source: Front Oncol. 2022 Oct 18;12:1004793. doi: 10.3389/fonc.2022.1004793 (PMC9623070; doi:10.3389/fonc.2022.1004793)
Supplement: Supplementary Table 2 — The intensity ratio of Western blot bands. [file Table_2.xlsx]

## Sheet: Sheet1
Figure 2a
RUNX1 expression	shRNA-Scrambled	shRNA-RUNX1 #1	shRNA-RUNX1 #2
	1	0.071	0.17
	1.09	0.16	0.23
	1.42	0.13	0.37
Figure 2b
RUNX1 expression	shRNA-Scrambled	shRNA-RUNX1 #1	shRNA-RUNX1 #2
	1	0.13	0.15
	0.83	0.07	0.12
	1.12	0.04	0.18
Figure 2c
Ang1 expression	Control	shRNA-Scrambled	shRNA-RUNX1 #1	shRNA-RUNX1 #2
	1	30.7	3.01	2.74
	1.59	28.93	2.53	5.382
	2.47	24.24	5.32	6.32
Figure 2d
Ang1 expression	Control	shRNA-Scrambled	shRNA-RUNX1 #1	shRNA-RUNX1 #2
	1	7.17	0.58	0.94
	0.73	10.12	1.27	1.19
	0.81	12.19	1.35	1.46
